# Supplementary material
Source: MDPI journal article supplement (https://www.mdpi.com/2073-4344/9/4/351)
Supplement: s1 [file s1]

# Supplementary material: The effect of potassium on cobalt-based Fischer-Tropsch catalysts with different cobalt particle sizes

Ljubiša Gavrilović, Jonas Save and Edd A. Blekkan\*

## Calculation procedures

### 1.1. Site time yield

The site-time yield (STY) was calculated as follows:

First, equation (1) was used to calculate the CO conversion:

$$X_{CO} = \frac{F_{in} - F_{out}}{F_{in}} = 1 - \frac{\left(\frac{A_{CO}}{A_{N_2}}\right)_x}{\left(\frac{A_{CO}}{A_{N_2}}\right)_{feed}} \quad (1)$$

Where  $X_{CO}$  (%) is the CO conversion,  $F_{in}, F_{out}$  are inlet and outlet flow of the CO, respectively;  $A_{CO}, A_{N_2}$  are GC areas of CO and  $N_2$ , respectively;  $\left(\frac{A_{CO}}{A_{N_2}}\right)_x$  is the ratio of the GC areas at the hour  $x$ , while  $\left(\frac{A_{CO}}{A_{N_2}}\right)_{feed}$  is the ratio of the GC areas of the feed.

Then, the equation (2) is used to calculate the reaction rate:

$$r = \frac{F_{tot} * Y_{CO} * X_{CO}}{W} \quad (2)$$

Where  $r$  ( $\frac{ml}{g_{cat} * s}$ ) is the reaction rate;  $F_{tot}$  is the total syngas flow;  $Y_{CO}$  is the percentage of the CO in the gas;  $X_{CO}$  is the conversion of the CO;  $W$  is the catalyst mass. The STY is then calculated using equation (3):

$$STY = \frac{r * M_{CO}}{V_m * 3600 * \frac{x_m}{100} * \frac{D}{100}} \quad (3)$$

Where STY ( $\frac{mol_{CO}}{mol_{cat} * s}$ ) is the site time yield;  $r$  ( $\frac{ml}{g_{cat} * s}$ ) is the reaction rate;  $M_{CO}$  ( $\frac{g_{CO}}{mol_{CO}}$ ) is the molecular mass of CO;  $V_m$  ( $\frac{ml}{mol}$ ) is the volumetric flow per mole of syngas;  $x_m$  ( $\frac{g_{CO}}{g_{cat}}$ ) is the metal loading;  $D$  (%) is catalyst dispersion.

### 1.2. Selectivities.

In order to calculate the methane selectivity ( $S_{CH_4}$ ), a methane flow needs to be found (4):

$$F_{CH_4} = \frac{F_{N_2} * RRF_{CH_4} * A_{CH_4}}{A_{N_2}} \quad (4)$$

Where  $F_{CH_4}$  ( $\frac{ml}{min}$ ) is the methane flow;  $F_{N_2}$  ( $\frac{ml}{min}$ ) is the nitrogen flow;  $RRF_{CH_4}$  is relative response factor of methane obtained from the calibration data;  $A_{CH_4}$  and  $A_{N_2}$  are GC areas for methane and nitrogen, respectively. Then, the methane selectivity is calculated using equation (5):

$$S_{CH_4} = \frac{F_{CH_4}}{F_{CO} * X_{CO}} \quad (5)$$

Where  $S_{CH_4}$  (%) is the methane selectivity;  $F_{CH_4}$  ( $\frac{ml}{min}$ ) is the methane flow;  $F_{CO}$  ( $\frac{ml}{min}$ ) is the CO flow;  $X_{CO}$  (%) is the CO conversion.

The same procedure is used to calculate  $CO_2$  selectivity ( $S_{CO_2}$ ) using equation (6):

$$F_{CO_2} = \frac{F_{N_2} * RRF_{CO_2} * A_{CO_2}}{A_{N_2}} \quad (6)$$

Where  $F_{CO_2}(\frac{ml}{min})$  is the  $CO_2$  flow;  $F_{N_2}(\frac{ml}{min})$  is the nitrogen flow;  $RRF_{CO_2}$  is relative response of  $CO_2$  factor obtained from the calibration data;  $A_{CO_2}$  and  $A_{N_2}$  are GC areas for  $CO_2$  and nitrogen, respectively. Then, the  $CO_2$  selectivity is calculated using equation (7):

$$S_{CO_2} = \frac{F_{CO_2}}{F_{CO} * X_{CO}} \quad (7)$$

Where  $S_{CO_2}(\%)$  is  $CO_2$  selectivity;  $F_{CO_2}(\frac{ml}{min})$  is the  $CO_2$  flow;  $F_{CO}(\frac{ml}{min})$  is  $CO$  flow;  $X_{CO}(\%)$  is  $CO$  conversion.

Finally, the  $C_{5+}$  selectivity is calculated using equation (8):

$$S_{C_{5+}} = 1 - (S_{CH_4} + S_{C_2} + S_{C_3} + S_{C_4} + S_{CO_2}) \quad (8)$$

Where  $S_{C_2}$ ,  $S_{C_3}$ ,  $S_{C_4}$  are selectivities to  $C_2, C_3, C_4$ , respectively calculated using the same procedure described above.
